# Supplementary material for: Wettability-tuned silica particles for emulsion-templated microcapsules
Source: Royal Society of Chemistry journal article supplement (doi:10.1039/d3sm00860f), 2023-01-01
Supplement: d3sm00860f1.pdf [file d3sm00860f1.pdf]

Supplementary Information for

## Wettability-Tuned Silica Particles for Emulsion-Templated Microcapsules

Nicholas C. Starvaggi,<sup>1</sup> B. Jack Bradford,<sup>2</sup> Cameron D.L. Taylor,<sup>2</sup> Emily B. Pentzer<sup>\*1,2</sup>

<sup>1</sup>Dept. of Chemistry, Texas A&M University, College Station, TX 77843

<sup>2</sup>Dept. of Materials Science & Engineering, Texas A&M University, College Station, TX 77843

\*Correspondence: [emilypentzer@tamu.edu](mailto:emilypentzer@tamu.edu)

### Table of Contents.

**Table S1.** Amounts of monomer used for interfacial polymerization in various emulsion systems.

**Table S2.** Average diameters of polyurea/silica microcapsules.

**Table S3.** Average weight percent encapsulated material as determined via mass difference or quantitative <sup>1</sup>H NMR.

**Figure S1.** Representative <sup>1</sup>H-NMR spectrum of extracted [BMIM][PF<sub>6</sub>] in deuterated acetone with mesitylene as an internal standard.

**Figure S2.** Particle size distribution for modified silica particles.

**Figure S3.** Contact angle determination for SiO<sub>2</sub>-Pristine, SiO<sub>2</sub>-NH<sub>2</sub>, and SiO<sub>2</sub>-C1.

**Figure S4.** Optical microscopy results of additional emulsion systems.

**Figure S5.** Optical microscopy results of varied surfactant loading (0.5 wt% - 5 wt%) for PAO<sub>432</sub>-in-H<sub>2</sub>O, [BMIM][PF<sub>6</sub>]-in-toluene, and DMF-in-octane emulsion systems.

**Figure S6.** Optical microscopy results of varied phase volume (1:9 – 9:1) for PAO<sub>432</sub>-in-H<sub>2</sub>O emulsion system.

**Figure S7.** Additional SEM images of prepared microcapsules.

**Table S1.** Amounts of diamine and diisocyanate used for interfacial polymerization in different emulsion systems.

| Microcapsule Type        | Continuous Phase | Ethylenediamine Amount (mmol) | 1,6-hexanediisocyanate Amount (mmol) |
|--------------------------|------------------|-------------------------------|--------------------------------------|
| PAO <sub>432</sub>       | Water            | 1.7                           | 1.3                                  |
| [BMIM][PF <sub>6</sub> ] | Toluene          | 1.3                           | 1.7                                  |
| DMF                      | Octane           | 1.3                           | 1.7                                  |

**Table S2.** Average diameters of polyurea/silica microcapsules as determined by laser diffraction.

| Microcapsule Type        | Method            | Average Diameter ( $\mu\text{m}$ ) |
|--------------------------|-------------------|------------------------------------|
| PAO <sub>432</sub>       | Laser Diffraction | 34.8 $\pm$ 25.8                    |
| [BMIM][PF <sub>6</sub> ] |                   | 13.8 $\pm$ 6.3                     |
| DMF                      |                   | 27.5 $\pm$ 17.1                    |

**Table S3.** Average weight percent encapsulated material as determined via mass difference or quantitative <sup>1</sup>H NMR using mesitylene as an internal standard.

| Microcapsule Type        | Method             | Weight Percent Core |
|--------------------------|--------------------|---------------------|
| PAO <sub>432</sub>       | Mass Difference    | 82.5 $\pm$ 2.4      |
| [BMIM][PF <sub>6</sub> ] | <sup>1</sup> H NMR | 68 $\pm$ 0.009      |
| DMF                      | N/A                | N/A                 |

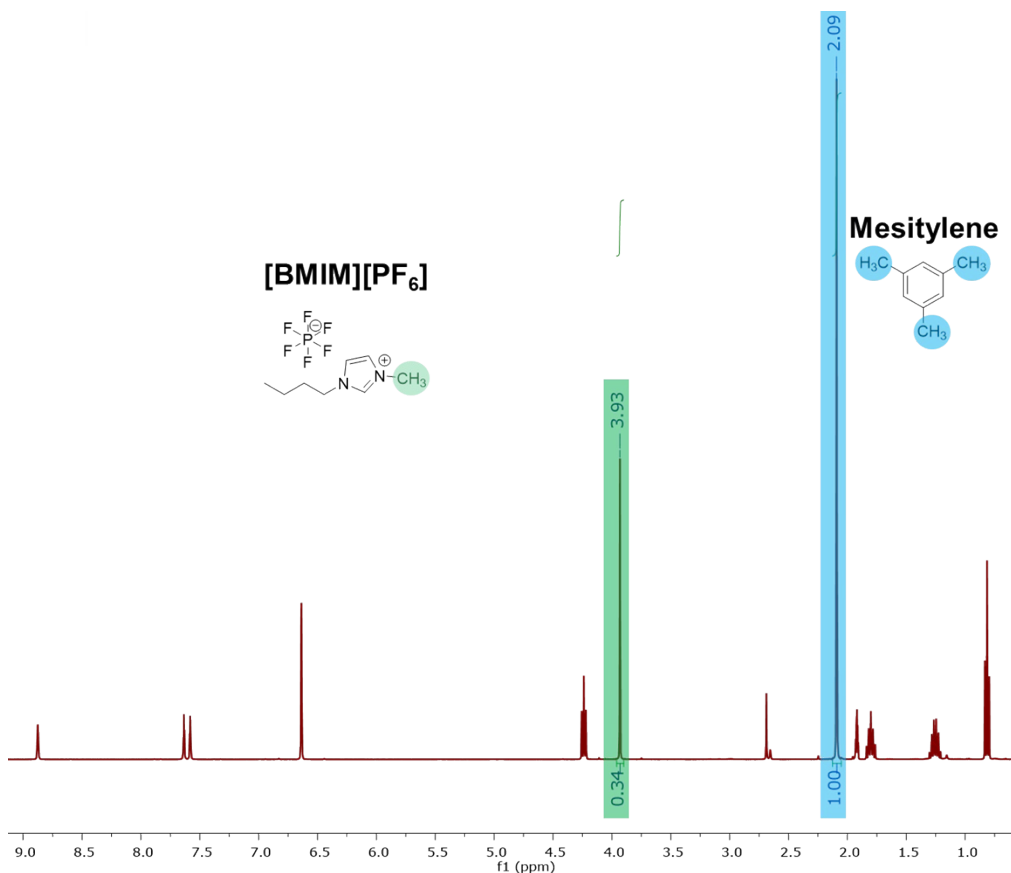

**Figure S1.** Representative <sup>1</sup>H-NMR spectrum of extracted [BMIM][PF<sub>6</sub>] in deuterated acetone with mesitylene as an internal standard. The relative integration of peaks shaded in green and blue was used to determine weight% core.

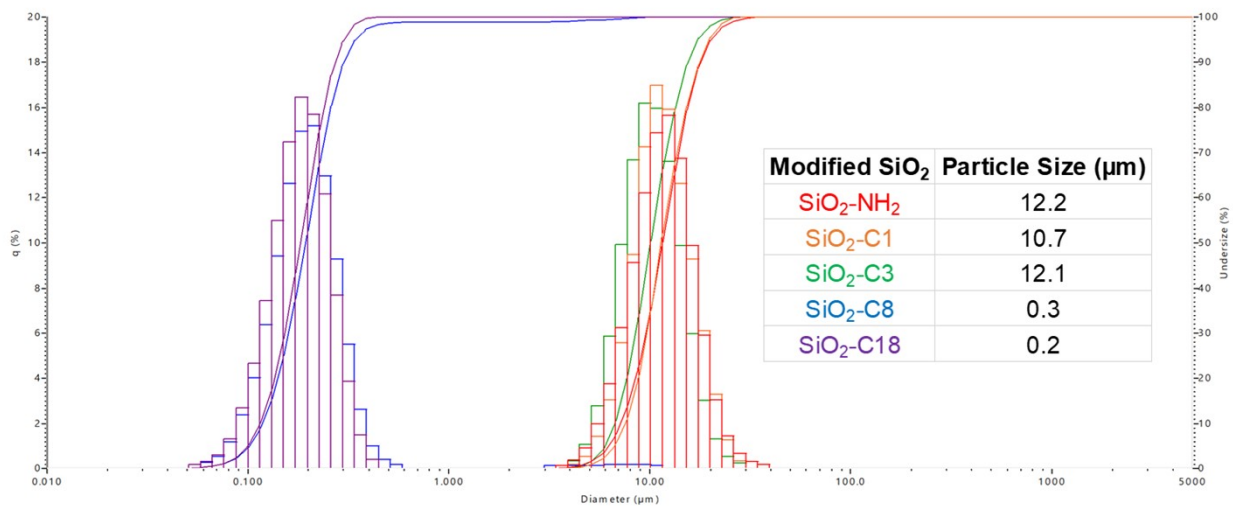

**Figure S2.** Particle size distributions for modified silica particles.

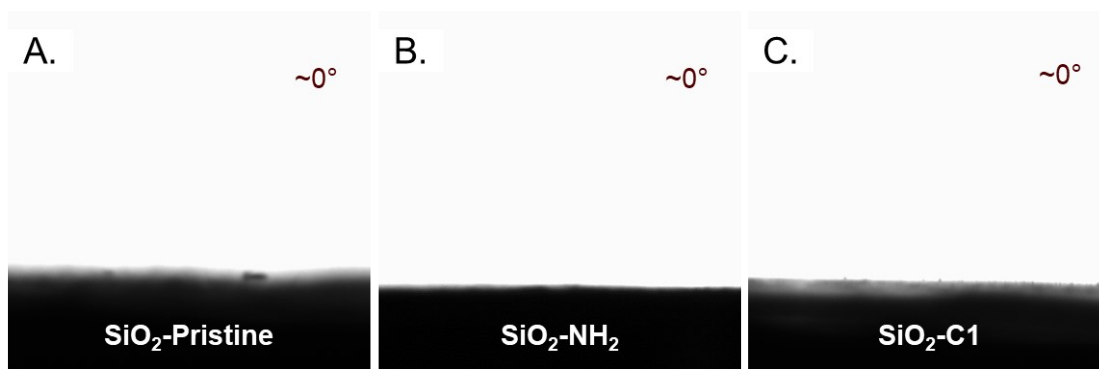

**Figure S3.** Contact angle determination for (A) SiO<sub>2</sub>-Pristine, (B) SiO<sub>2</sub>-NH<sub>2</sub>, and (C) SiO<sub>2</sub>-C1. Due to high hydrophilicity of all three substrates, no measurement could be recorded.

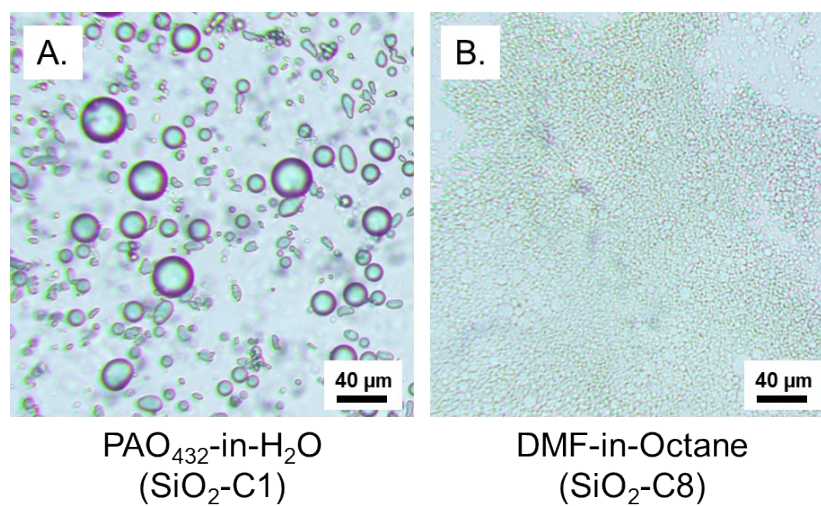

**Figure S4.** Optical microscopy of additional emulsion systems. (A) PAO<sub>432</sub>-in-water stabilized by SiO<sub>2</sub>-C1; (B) *N,N*-dimethylformamide-in-octane stabilized by SiO<sub>2</sub>-C8.

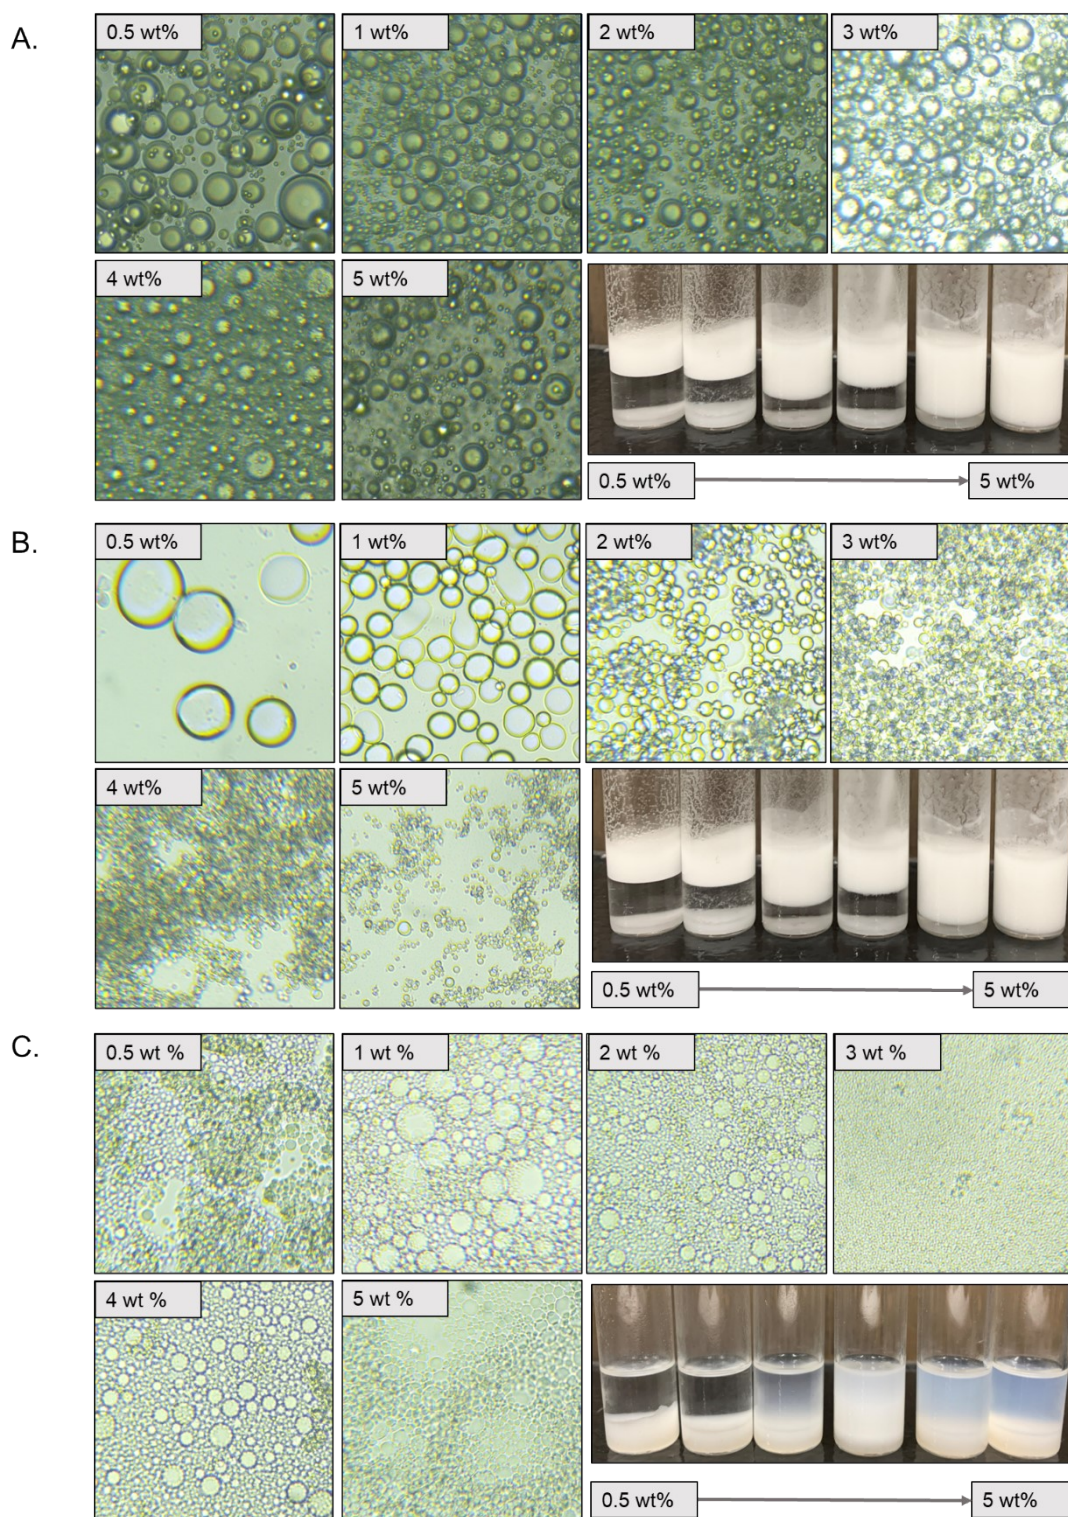

**Figure S5.** Optical microscopy results of varied surfactant loading (0.5 wt% – 5 wt%) for PAO<sub>432</sub>-in-H<sub>2</sub>O (A), [BMIM][PF<sub>6</sub>]-in-toluene (B), and DMF-in-octane (C) emulsion systems. Total emulsion volume was held at 3 mL.

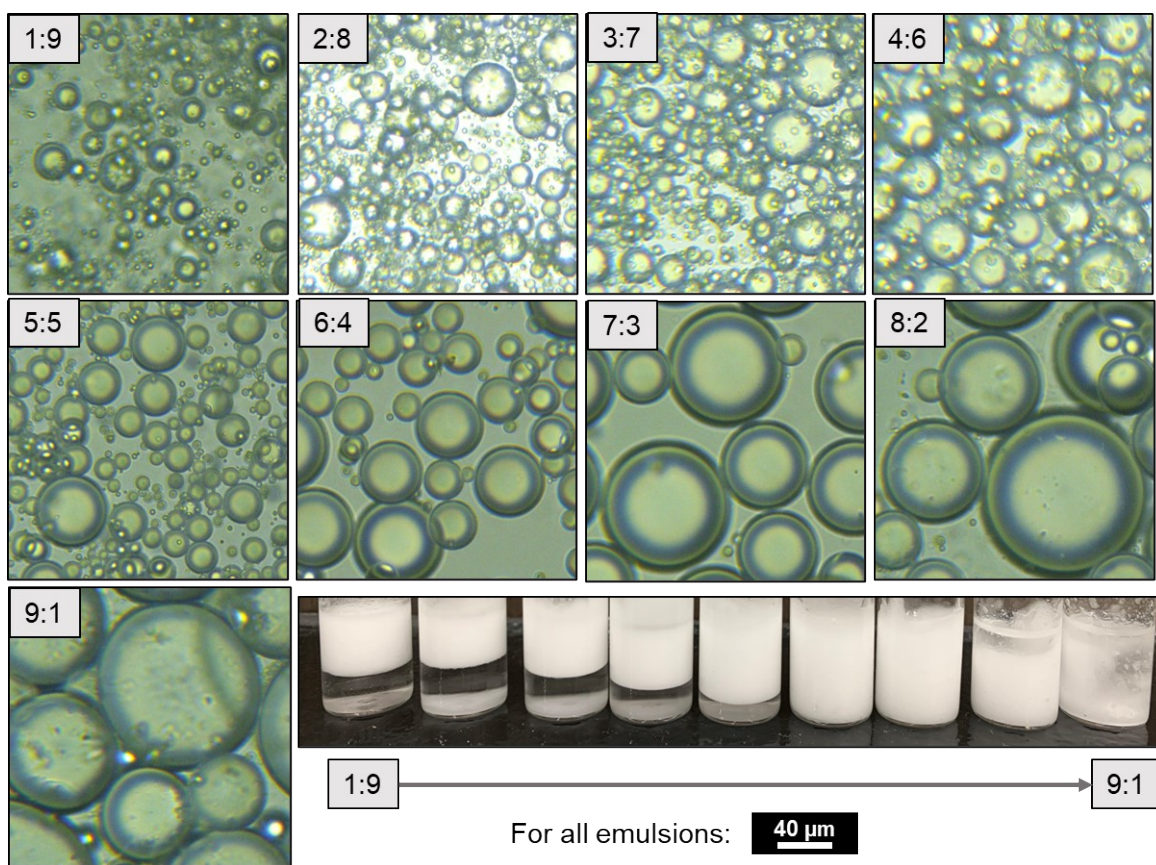

**Figure S6.** Optical microscopy results of varied phase volume (1:9 – 9:1) for PAO<sub>432</sub>-in-H<sub>2</sub>O emulsion system. SiO<sub>2</sub>-NH<sub>2</sub> loading was maintained at 3 wt% across all emulsions; total emulsion volume was held at 3 mL.

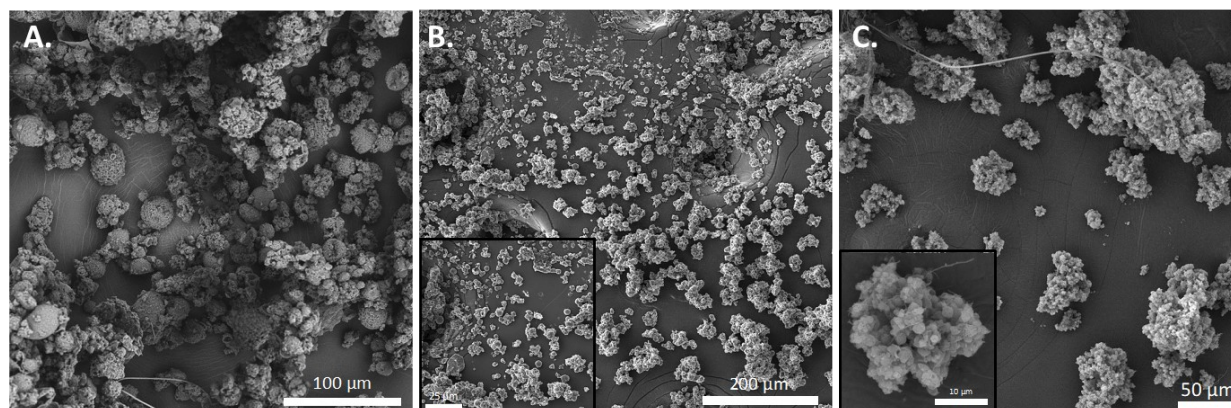

**Figure S7.** Additional SEM images of prepared microcapsules: (A) PAO<sub>432</sub>, (B) [BMIM][PF<sub>6</sub>], and (C) DMF.
